# Supplementary material for: Insights into the Differential Preservation of Bone Proteomes in Inhumed and Entombed Cadavers from Italian Forensic Caseworks
Source: PubMed Central journal article supplement (PMC9087355; doi:10.1021/acs.jproteome.1c00904), 2022-03-22
Supplement: pr1c00904_si_001.pdf [file pr1c00904_si_001.pdf]

## Supplementary Information

### Insights into the Differential Preservation of Bone Proteomes in Inhumed and Entombed Cadavers from Italian Forensic Caseworks

Andrea Bonicelli<sup>1</sup>, Aldo Di Nunzio<sup>2</sup>, Ciro Di Nunzio<sup>3</sup>, Noemi Procopio<sup>1\*</sup>

<sup>1</sup>*Forensic Science Research Group, Faculty of Health and Life Sciences, Applied Sciences, Northumbria University, NE1 8ST, Newcastle Upon Tyne, United Kingdom*

<sup>2</sup>*Chemical Sciences Department, University of Naples Federico II, 80126, Naples, Italy*

<sup>3</sup>*Legal Medicine Department, University of Catanzaro Magna Graecia, 88100, Germaneto, Italy*

**\*Author for correspondence:** Noemi Procopio, [noemi.procopio@northumbria.ac.uk](mailto:noemi.procopio@northumbria.ac.uk), Ellison Building, Northumbria University, Newcastle Upon-Tyne, NE1 8ST, UK

## **Supplementary Data, Tables and Figures**

**Supplementary Table S1.** Mean and standard deviations (SD) values for the proteins showing significant difference between the two burial conditions.

**Supplementary Table S2.** Correlation coefficients between each protein and both age and PMI.

**Supplementary Figure S1.** Error plots of proteins correlating significantly with PMI only.

**Supplementary Figure S2.** Error plots of proteins correlating significantly with age only.

**Supplementary Data S1.** Deamidation percentages for the six peptides highlighted in the study, in both zinc-lined (samples 1-8) and wooden (samples 9-14) coffins.

**Supplementary Table S1.** Mean and standard deviations (SD) values for the proteins showing significant difference between the two burial conditions. Significance: \*\*\* $p < 0.001$  \*\* $p < 0.01$ ; \* $p < 0.05$ .

|             | Zinc-lined coffin |       |       | Wooden coffin |       |       | Anova       |
|-------------|-------------------|-------|-------|---------------|-------|-------|-------------|
|             | N                 | Mean  | SD    | N             | Mean  | SD    |             |
| CLUS_HUMAN  | 16                | 13.96 | 0.471 | 12            | 13.35 | 0.572 | F=9.529***  |
| RCN3_HUMAN  | 16                | 12.69 | 0.807 | 12            | 11.92 | 1.279 | F=3.805*    |
| EMIL1_HUMAN | 16                | 14.59 | 0.89  | 12            | 14.02 | 0.719 | F=3.333*    |
| GAS6_HUMAN  | 16                | 13.64 | 1.475 | 12            | 12.81 | 0.826 | F=3.047*    |
| LYOX_HUMAN  | 16                | 18.49 | 0.404 | 12            | 18.11 | 0.477 | F=5.292**   |
| B2MG_HUMAN  | 16                | 15.16 | 0.687 | 12            | 14.60 | 0.934 | F=3.408*    |
| SODE_HUMAN  | 16                | 16.38 | 0.874 | 12            | 15.85 | 0.705 | F=2.961*    |
| ANT3_HUMAN  | 16                | 14.13 | 1.068 | 12            | 13.26 | 1.417 | F=3.411*    |
| FLNC_HUMAN  | 16                | 13.35 | 0.876 | 12            | 10.92 | 0.722 | F=61.211*** |
| FINC_HUMAN  | 16                | 15.18 | 0.387 | 12            | 14.62 | 0.456 | F=12.442*** |
| APOA1_HUMAN | 16                | 15.72 | 0.49  | 12            | 15.18 | 0.541 | F=7.84***   |
| MFGM_HUMAN  | 16                | 13.79 | 1.237 | 12            | 15.22 | 1.223 | F=9.263***  |
| A1AT_HUMAN  | 16                | 15.27 | 0.775 | 12            | 14.75 | 0.642 | F=3.59*     |
| POSTN_HUMAN | 16                | 12.12 | 1.924 | 12            | 14.17 | 1.072 | F=11.061*** |
| TENA_HUMAN  | 16                | 14.59 | 0.401 | 12            | 14.16 | 0.371 | F=8.181***  |
| PPBT_HUMAN  | 16                | 16.12 | 0.326 | 12            | 15.82 | 0.391 | F=5.12***   |
| HTRA1_HUMAN | 16                | 16.59 | 0.484 | 12            | 16.17 | 0.51  | F=4.772***  |
| NUCB2_HUMAN | 16                | 16.38 | 0.598 | 12            | 15.82 | 0.309 | F=8.529***  |
| ENPL_HUMAN  | 16                | 15.47 | 0.437 | 12            | 14.92 | 0.449 | F=10.463*** |
| TETN_HUMAN  | 16                | 16.78 | 0.619 | 12            | 16.28 | 0.548 | F=4.94**    |
| OSTCN_HUMAN | 16                | 23.3  | 0.55  | 12            | 22.79 | 0.654 | F=4.913**   |
| ZPI_HUMAN   | 16                | 15.71 | 0.626 | 12            | 15.22 | 0.653 | F=4.055*    |
| OLFL3_HUMAN | 16                | 17.18 | 0.39  | 12            | 16.75 | 0.574 | F=5.539**   |
| TTHY_HUMAN  | 16                | 17.83 | 0.554 | 12            | 17.24 | 0.661 | F=6.577**   |
| COMA1_HUMAN | 16                | 17.32 | 0.42  | 12            | 16.91 | 0.485 | F=5.604**   |
| COCA1_HUMAN | 16                | 18.37 | 0.496 | 12            | 17.81 | 0.419 | F=10.049*** |
| LUM_HUMAN   | 16                | 22.45 | 0.541 | 12            | 22.00 | 0.575 | F=4.486**   |
| PGS1_HUMAN  | 16                | 22.79 | 0.506 | 12            | 22.36 | 0.557 | F=4.485**   |

**Supplementary Table S2.** Correlation coefficients between each protein and both age and PMI. Significance: \*\*\*\* $p < 0.0001$ ; \*\*\* $p < 0.001$  \*\* $p < 0.01$ ; \* $p < 0.05$ .

| <b>Spearman</b> | <b>PMI</b> | <b>Age</b> |
|-----------------|------------|------------|
| A1AT_HUMAN      | -0.05      | -0.05      |
| A4_HUMAN        | -0.34      | -0.57**    |
| ACTB_HUMAN      | 0.08       | 0.34       |
| AEBP1_HUMAN     | -0.12      | 0.16       |
| ALBU_HUMAN      | -0.50**    | -0.59**    |
| ANT3_HUMAN      | 0.39*      | -0.01      |
| APOA1_HUMAN     | -0.19      | -0.11      |
| APOA4_HUMAN     | -0.23      | -0.31      |
| ASPN_HUMAN      | -0.56**    | -0.41*     |
| B2MG_HUMAN      | -0.50**    | -0.12      |
| BMP1_HUMAN      | -0.28      | -0.15      |
| CFAB_HUMAN      | -0.1       | -0.43*     |
| CHAD_HUMAN      | 0.38*      | -0.35      |
| CLC11_HUMAN     | -0.47*     | -0.63***   |
| CLUS_HUMAN      | -0.2       | -0.31      |
| CO5A1_HUMAN     | -0.23      | -0.34      |
| CO5A2_HUMAN     | 0.12       | -0.28      |
| CO9_HUMAN       | -0.27      | -0.57**    |
| COBA2_HUMAN     | -0.14      | -0.46*     |
| COCA1_HUMAN     | 0.24       | 0.61***    |
| COMA1_HUMAN     | -0.01      | -0.41*     |
| CSPG2_HUMAN     | -0.68****  | 0.11       |
| CTHR1_HUMAN     | 0.04       | -0.31      |
| DERM_HUMAN      | 0.22       | 0.25       |
| ECM2_HUMAN      | -0.04      | -0.33      |
| EMIL1_HUMAN     | -0.05      | -0.21      |
| ENPL_HUMAN      | 0.1        | 0.09       |
| EZRI_HUMAN      | -0.08      | -0.63***   |
| FA10_HUMAN      | -0.29      | -0.05      |
| FA7_HUMAN       | 0.33       | -0.1       |
| FA9_HUMAN       | 0.09       | -0.03      |
| FETUA_HUMAN     | -0.44*     | -0.39*     |
| FINC_HUMAN      | -0.23      | -0.02      |
| FLNC_HUMAN      | -0.05      | 0.16       |
| FMOD_HUMAN      | -0.40*     | -0.39*     |
| G3P_HUMAN       | -0.39*     | 0.03       |
| GAS6_HUMAN      | 0.05       | 0.26       |
| HBB_HUMAN       | -0.13      | 0.12       |

|             |         |           |
|-------------|---------|-----------|
| HRG_HUMAN   | -0.56** | -0.27     |
| HTRA1_HUMAN | -0.36   | -0.25     |
| IBP5_HUMAN  | -0.39*  | -0.43*    |
| IGG1_HUMAN  | -0.24   | -0.39*    |
| IGKC_HUMAN  | -0.25   | -0.22     |
| IGL1_HUMAN  | -0.46*  | -0.29     |
| KAZD1_HUMAN | -0.31   | -0.43*    |
| KCRM_HUMAN  | -0.05   | -0.21     |
| KNG1_HUMAN  | -0.40*  | -0.09     |
| LUM_HUMAN   | -0.12   | -0.23     |
| LYOX_HUMAN  | -0.21   | -0.11     |
| MFGM_HUMAN  | -0.28   | -0.46*    |
| MGP_HUMAN   | -0.19   | -0.13     |
| MIME_HUMAN  | -0.44*  | -0.39*    |
| MYH2_HUMAN  | 0.37    | 0.03      |
| MYH7_HUMAN  | 0.16    | 0.01      |
| NUCB1_HUMAN | -0.44*  | -0.47*    |
| NUCB2_HUMAN | -0.24   | -0.06     |
| OLFL3_HUMAN | 0.12    | 0.03      |
| OMD_HUMAN   | -0.26   | -0.62***  |
| OSTCN_HUMAN | -0.23   | -0.07     |
| OSTP_HUMAN  | -0.27   | -0.36     |
| PCOC1_HUMAN | -0.45*  | -0.16     |
| PDIA1_HUMAN | -0.32   | -0.47*    |
| PEDF_HUMAN  | -0.21   | -0.50**   |
| PERM_HUMAN  | -0.35   | 0.13      |
| PGBM_HUMAN  | -0.45*  | -0.29     |
| PGS1_HUMAN  | -0.13   | -0.26     |
| PGS2_HUMAN  | -0.14   | 0.04      |
| POSTN_HUMAN | -0.32   | -0.33     |
| PPBT_HUMAN  | -0.05   | -0.2      |
| PROC_HUMAN  | -0.29   | -0.69**** |
| PROS_HUMAN  | 0.25    | 0.05      |
| PROZ_HUMAN  | 0.1     | 0.3       |
| RCN3_HUMAN  | -0.40*  | -0.14     |
| SIAL_HUMAN  | -0.01   | 0.04      |
| SODE_HUMAN  | -0.41*  | 0.29      |
| SPP24_HUMAN | -0.32   | 0.35      |
| SPRC_HUMAN  | -0.37   | -0.27     |
| SRPX_HUMAN  | -0.11   | -0.11     |
| TENA_HUMAN  | 0.17    | -0.01     |
| TETN_HUMAN  | 0.07    | -0.31     |

|             |         |        |
|-------------|---------|--------|
| TGFB1_HUMAN | -0.2    | 0.08   |
| THRB_HUMAN  | -0.02   | -0.44* |
| TRH_HUMAN   | -0.49** | -0.15  |
| TSP1_HUMAN  | -0.21   | -0.25  |
| TTHY_HUMAN  | -0.47*  | -0.29  |
| VITRN_HUMAN | 0.17    | -0.37  |
| VTNC_HUMAN  | -0.06   | 0.28   |
| ZPI_HUMAN   | 0.2     | 0.1    |

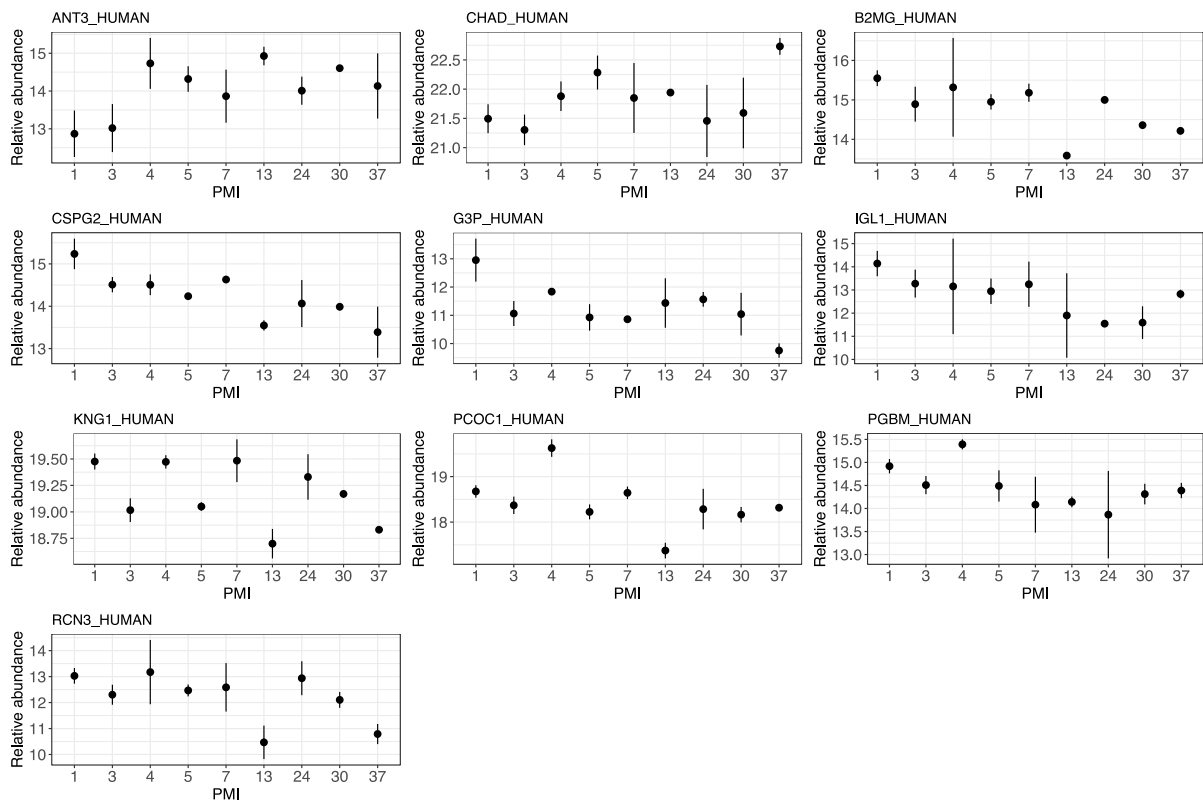

**Supplementary Figure S1.** Error plots of proteins correlating significantly with PMI only.

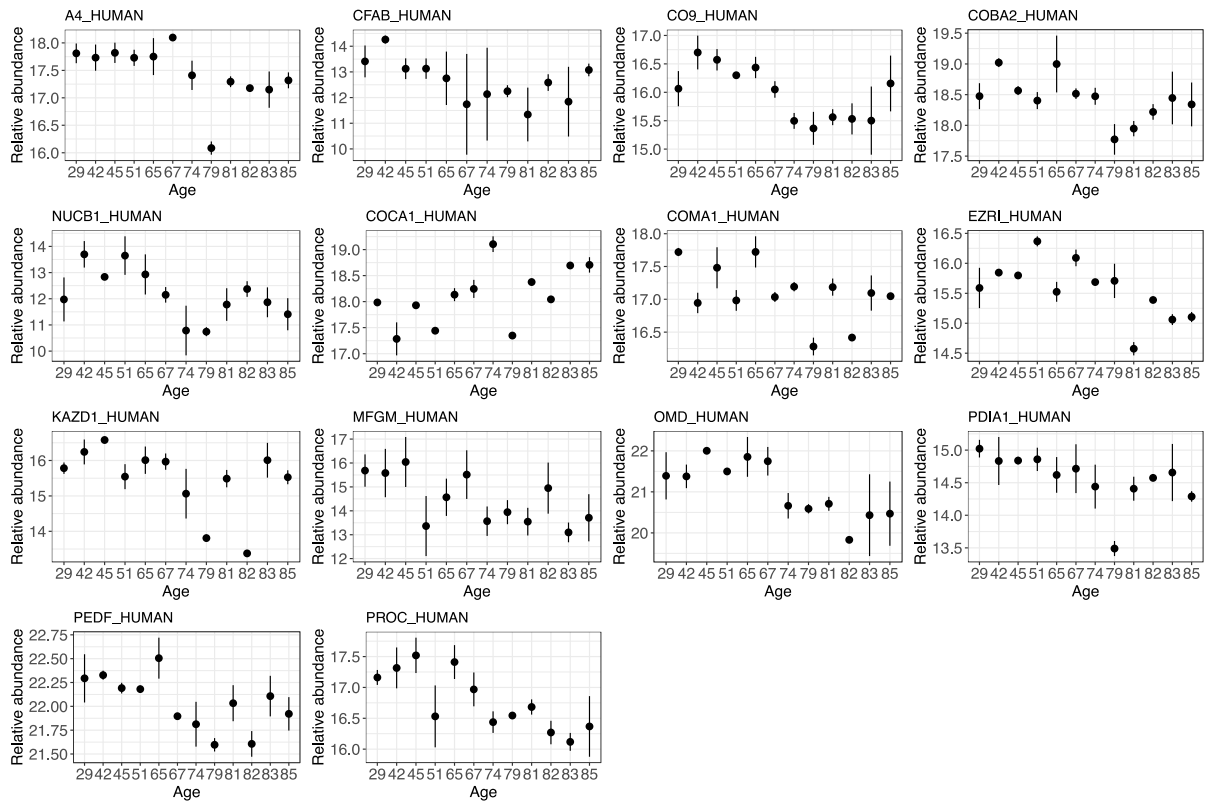

**Supplementary Figure S2.** Error plots of proteins correlating significantly with age only.
